# Supplementary material
Source: publisher site journal article supplement (https://www.dovepress.com/article/348369)
Supplement: Supplementary file 1 [file get_supplementary_file.php]

**Supplementary Table 1. Comparison of patients who answered the questionnaire on their experience during transition to the adult service and those who did not answer the questionnaire**

|                                            | <b>Patients who<br/>answered the<br/>questionnaire<br/>(N = 35)</b> | <b>Patients who did<br/>not answer the<br/>questionnaire<br/>(N = 17)</b> | <b>P<br/>value</b> |
|--------------------------------------------|---------------------------------------------------------------------|---------------------------------------------------------------------------|--------------------|
| Age (years) at transition, mean $\pm$ SD   | 18.4 $\pm$ 0.8                                                      | 18.6 $\pm$ 1.1                                                            | 0.75               |
| Sex (female), n (%)                        | 20 (57%)                                                            | 6 (35.3%)                                                                 | 0.24               |
| BMI (kg/m <sup>2</sup> ), mean $\pm$ SD    | 24.3 $\pm$ 6.2                                                      | 24.2 $\pm$ 4.2                                                            | 0.63               |
| Age of asthma onset (years), mean $\pm$ SD | 4.1 $\pm$ 3.9                                                       | 3.4 $\pm$ 3.8                                                             | 0.6                |
| Asthma phenotype, n (%)                    |                                                                     |                                                                           |                    |
| Allergic asthma (eosinophilic)             | 26 (74.3%)                                                          | 12 (70.6%)                                                                | 1                  |
| Asthma and allergic poly-morbidities       | 21 (60%)                                                            | 12 (70.6%)                                                                | 0.55               |
| Non-allergic eosinophilic asthma           | 3 (8.6%)                                                            | 2 (11.8%)                                                                 | 1                  |
| Non-allergic non-eosinophilic asthma       | 6 (1.7%)                                                            | 3 (17.6%)                                                                 | 1                  |
| Asthma and poly-morbidities                | 8 (2.3%)                                                            | 2 (11.8%)                                                                 | 0.47               |
| Asthma treatment at transition, n (%)      |                                                                     |                                                                           |                    |
| ISC: dose equivalent of budesonide         |                                                                     |                                                                           |                    |
| Mean/median                                | 1216 / 1000                                                         | 1659/2000                                                                 | 0.43               |
| Low dose                                   | 4 (11.4%)                                                           | 3 (17.6%)                                                                 | 0.67               |
| Moderate dose                              | 6 (17.1%)                                                           | 4 (23.5%)                                                                 | 0.71               |
| High dose                                  | 25 (71.4%)                                                          | 10 (58.8%)                                                                | 0.53               |
| Biologics, n (%)                           | 12 (34.3%)                                                          | 7 (41.2%)                                                                 | 0.76               |
| Omalizumab                                 | 11 (31.4%)                                                          | 6 (35.3%)                                                                 |                    |
| Mepolizumab                                | 0 (0%)                                                              | 1 (5.9%)                                                                  |                    |
| Benralizumab                               | 0 (0%)                                                              | 0 (0%)                                                                    |                    |

|                                        |                 |                 |      |
|----------------------------------------|-----------------|-----------------|------|
| Dupilumab                              | 1 (2.9%)        | 0 (0%)          |      |
| Adherence to treatment, n (%)          |                 |                 |      |
| Good                                   | 25 (71.4%)      | 11 (64.7%)      | 0.75 |
| Moderate                               | 9 (25.7%)       | 6 (35.3%)       | 0.52 |
| Poor                                   | 1 (2.9%)        | 0 (0%)          | 1    |
| Smoking active, n (%)                  | 3 (8.6%)        | 0 (0%)          | 0.54 |
| ACT score (mean/median/SD)             |                 |                 |      |
| Baseline                               | 21.6 / 23 / 3.6 | 17.4 / 19 / 6.5 | 0.72 |
| 6 months                               | 21.1 / 22 / 4.5 | 18.5 / 19 / 5.4 | 0.14 |
| 12 months                              | 20.5 / 23 / 4.9 | 19.9 / 22 / 5.3 | 0.80 |
| 24 months                              | 20.1 / 21 / 4.4 | 20.7 / 23 / 5.3 | 0.53 |
| 36 months                              | 19.9 / 20 / 5   | 20 / 20 / 4.7   | 0.94 |
| Patients with no regular follow-up for |                 |                 |      |
| >12 months in the adult centre, n (%)  | 11 (31.4%)      | 8 (47%)         | 0.36 |
| Mean duration between 2 consultations  | 23              | 24.6            | 0.97 |
| (months)                               |                 |                 |      |

**Notes:** Data are shown as the mean  $\pm$  standard deviation (SD), median or number (%). P-values were obtained using the Fisher's exact test or the Wilcoxon-Mann Whitney test, as appropriate. A p-value of  $< 0.05$  was considered statistically significant.

**Abbreviations:** BMI, body mass index; ICS, inhaled corticosteroid; ACT, asthma control test
